# Supplementary material for: Mesoporous silica-based hybrid materials for bone-specific drug delivery
Source: PubMed Central journal article supplement — Nanoscale Adv. 2019 Jul 3;1(8):3269–78. doi: 10.1039/c9na00249a (PMC9417532; doi:10.1039/c9na00249a), 2019-07-03
Supplement: NA-001-C9NA00249A-s005.pdf [file NA-001-C9NA00249A-s005.pdf]

# ARTICLE

## Mesoporous silica-based hybrid materials for bone-specific drug delivery

Luigi Pasqua<sup>a†</sup>, Ilaria Ester De Napoli<sup>a</sup>, Marzia De Santo<sup>a</sup>, Marianna Greco<sup>b</sup>, Enrico Catizzone<sup>a</sup>, Domenico Lombardo<sup>c</sup>, Gabriella Montera<sup>a</sup>, Alessandra Comandè<sup>b</sup>, Alessandra Nigro<sup>b</sup>, Catia Morelli<sup>b</sup> and Antonella Leggio<sup>b</sup>

Received 00th January 20xx,  
Accepted 00th January 20xx

DOI: 10.1039/x0xx00000x

### Supplementary figures

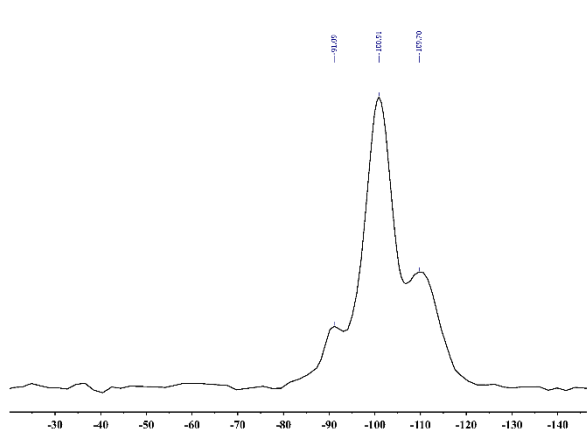

Figure S1 <sup>29</sup>Si CP-MAS NMR spectrum of sample MSN

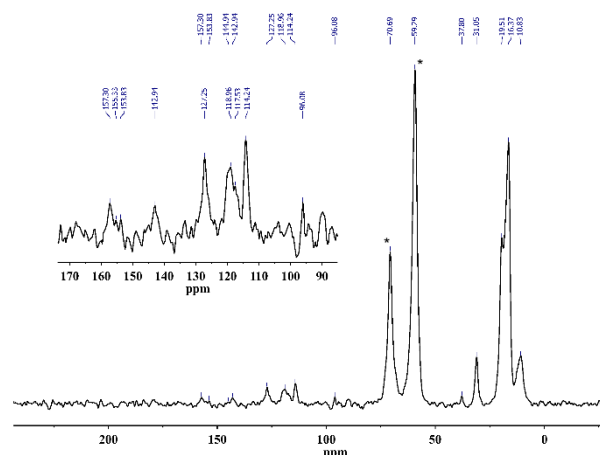

Figure S3 <sup>13</sup>C CP-MAS NMR spectrum of sample MSN-CN

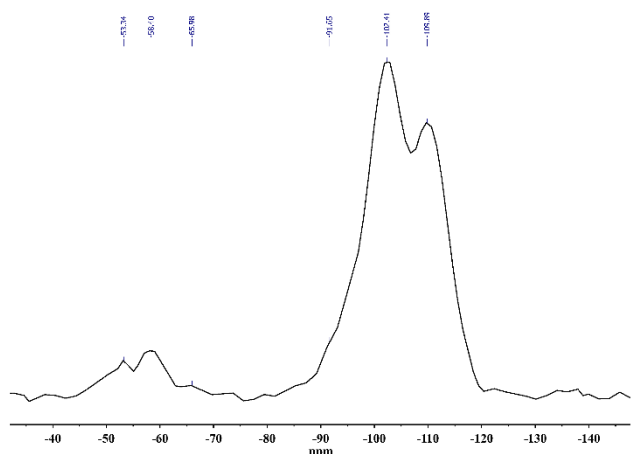

Figure S2 <sup>29</sup>Si CP-MAS NMR spectrum of sample MSN-CN

| SOLUTION                        | ABSORBANCE<br>at 286 nm<br>[-] | ALENDRONATE<br>CONC.<br>[mM] |
|---------------------------------|--------------------------------|------------------------------|
| 1° loading filtered<br>solution | 0.119                          | 4.5                          |
| 2° loading filtered<br>solution | 0.132                          | 5                            |

Table S1 – UV-Vis spectrophotometric analysis results.

<sup>a</sup> Department of Environmental and Chemical Engineering, University of Calabria, 87036 Rende, Italy;

<sup>b</sup> Department of Pharmacy and Health and Nutritional Sciences, University of Calabria, 87036 Rende, Italy.

<sup>c</sup> Consiglio Nazionale delle Ricerche (CNR) – Istituto Processi Chimico-Fisici (IPCF), Messina – Italy;

† luigi.pasqua@unical.it

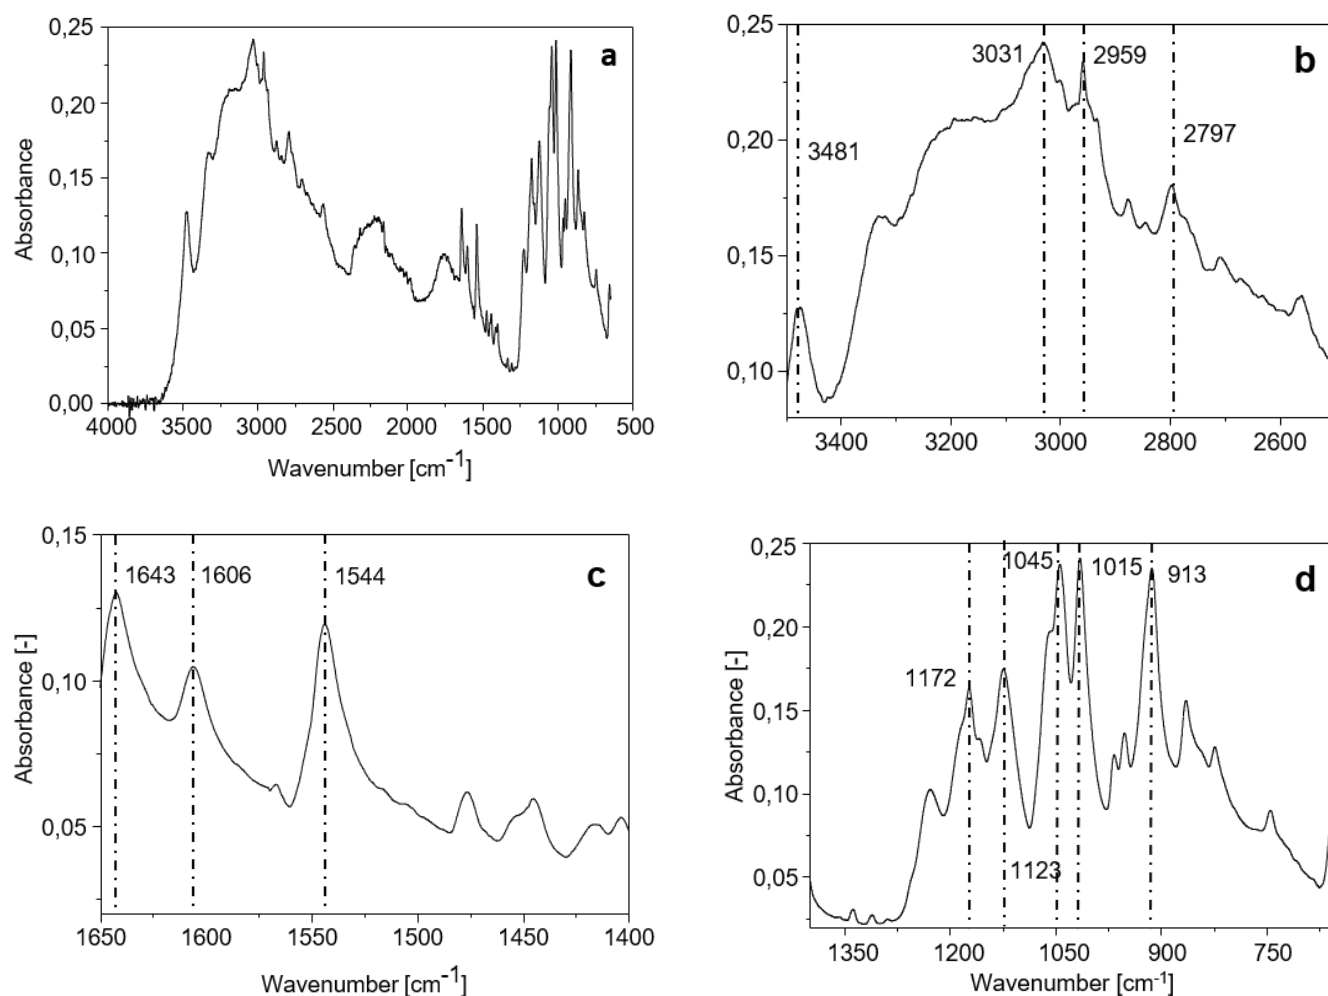

Fig. S4 FT-IR spectrum of Alendronate: a) Spectrum in the range 4000–500  $\text{cm}^{-1}$ ; b) Magnification in the range 3500–2500  $\text{cm}^{-1}$ ; c) Magnification in the range 1650–1450  $\text{cm}^{-1}$ ; d) Magnification in the range 1400–600  $\text{cm}^{-1}$

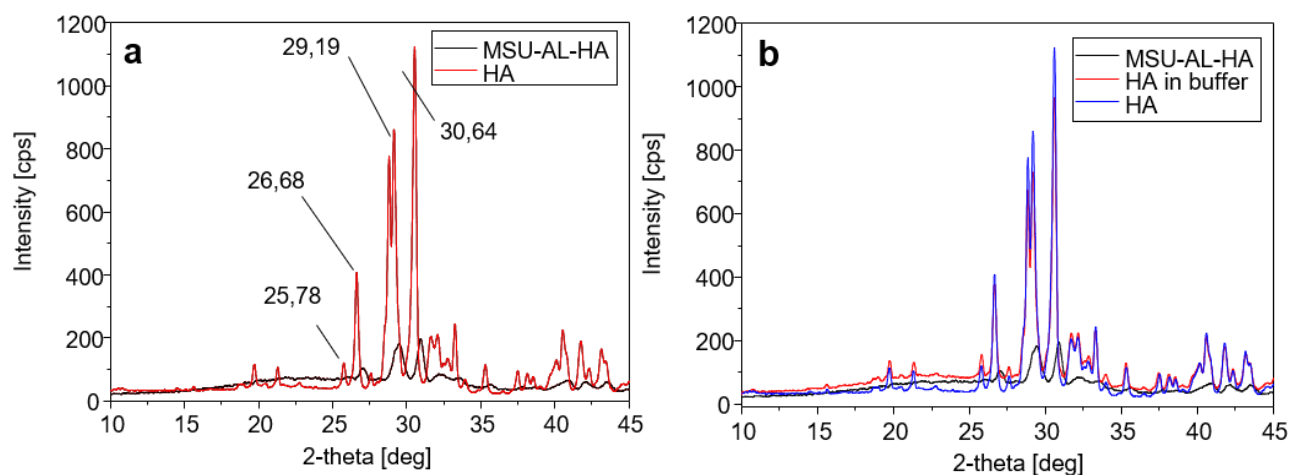

Fig. S5. X-ray diffraction patterns of HA in different conditions. Pure, a), after interaction with MSU-AL and in buffer

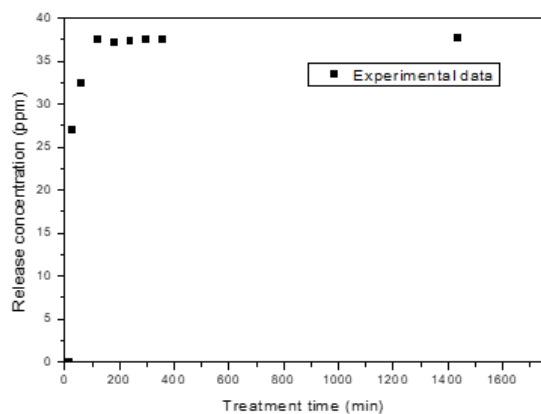

Figure S6 – Kinetic curve of IBU release at pH 7

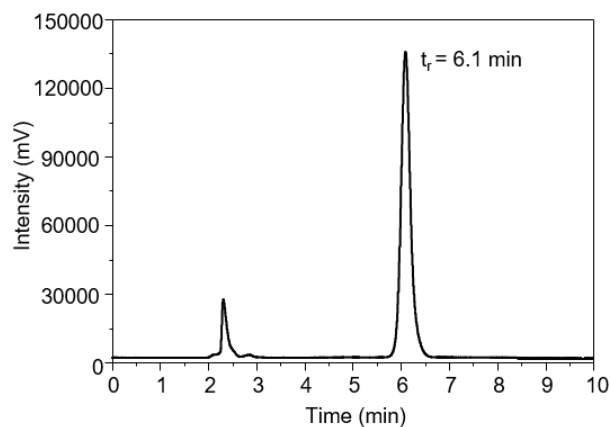

Figure S7– Chromatogram of IBU after release time of 30 min at pH 7.

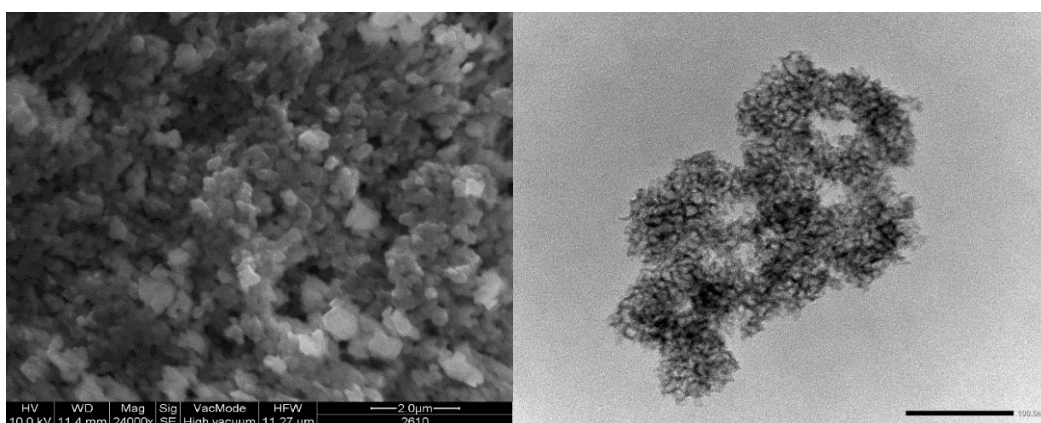

Figure S8 - a) Electron scanning microscopy (SEM) image of sample MSN-COOH-AL, b) TEM micrograph of the sample MSN-COOH-AL

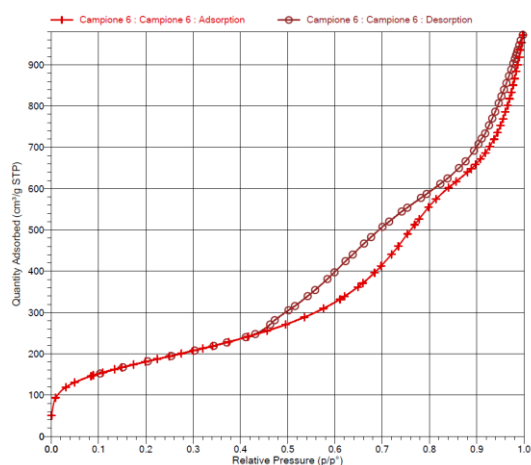

Figure S9 - Nitrogen adsorption-desorption isotherm of the starting MSN material after complete removal of the surfactant.
